# Supplementary material
Source: PubMed Central journal article supplement (PMC3805062)

## Supplemental Data

Figure 1 – Measured creatinine clearance and renal clearances of *p*-cresyl sulfate and indoxyl sulfate

Linear regression analysis of the relationship between measured creatinine clearance and renal clearances of (A) *p*-cresyl sulfate and (B) indoxyl sulfate.

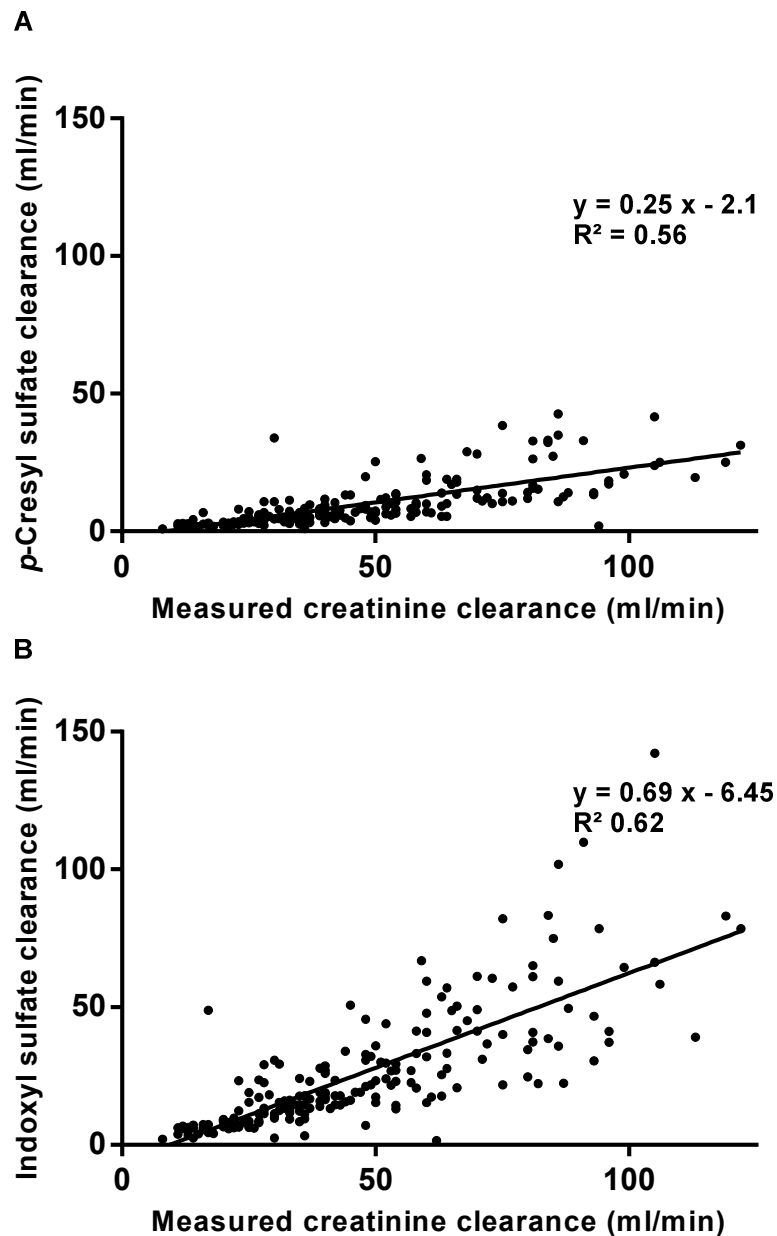

Figure 2 – Relationship between renal clearance of *p*-cresyl sulfate and indoxyl sulfate

(A) Correlation between renal clearance of *p*-cresyl sulfate and indoxyl sulfate (Spearman's rank correlation) (B) and linear regression analysis of the relationship between eGFR and ratio of renal clearance of indoxyl sulfate to *p*-cresyl sulfate.

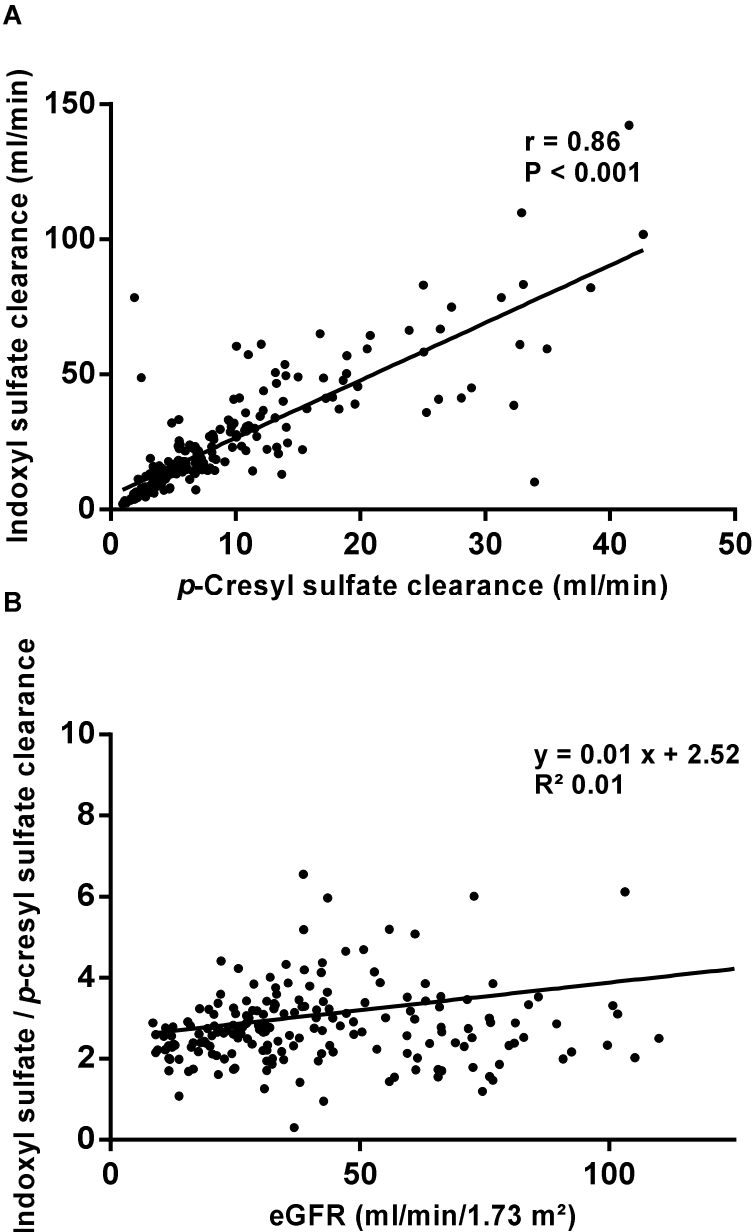

Supplement: CJN.00300113_CJN00300113SupplementaryData.pdf [file CJN.00300113_CJN00300113SupplementaryData.pdf]
